# Supplementary material for: The status quo and influencing factors of breastfeeding social support in China based on LASSO regression model
Source: PeerJ journal article supplement (doi:10.7717/peerj.18779), 2025-01-03
Supplement: Breastfeeding_social_support_scale__2.pdf [file Breastfeeding_social_support_scale__2.pdf]

## 母乳喂养社会支持量表

母乳喂养时，您属于下列哪种情况？请依次在“符合”到“不符合”之间进行“√”。

|    |                                                         | 不符合 | 不太符合 | 不能确定 | 有点符合 | 符合 |
|----|---------------------------------------------------------|-----|------|------|------|----|
| 1  | 有能够和您轻松谈论关于母乳喂养的人                                       | 1   | 2    | 3    | 4    | 5  |
| 2  | 为了您有时间给宝宝喂奶，有能够分担家务和照顾孩子的人                              | 1   | 2    | 3    | 4    | 5  |
| 3  | 您身边亲近的人，是您坚持母乳喂养的精神支柱                                   | 1   | 2    | 3    | 4    | 5  |
| 4  | 有人会告诉我有关母乳喂养积极的、好的经验                                    | 1   | 2    | 3    | 4    | 5  |
| 5  | 为了您能更轻松地照顾宝宝，有能够分担家务和照顾孩子的人                             | 1   | 2    | 3    | 4    | 5  |
| 6  | 必要时，能够和家人、朋友以外的人探讨母乳喂养相关问题                              | 1   | 2    | 3    | 4    | 5  |
| 7  | 医生、助产士、护士等医务人员大多支持您母乳喂养（例如：口头鼓励、微笑、拍拍肩膀、提供需要的信息和技术上的帮助） | 1   | 2    | 3    | 4    | 5  |
| 8  | 医生、助产士、护士等医务人员会告知您母乳喂养的好处                               | 1   | 2    | 3    | 4    | 5  |
| 9  | 当您母乳喂养遇到困难时，有能够和您商量的人                                   | 1   | 2    | 3    | 4    | 5  |
| 10 | 身边的人会照顾您，以便您能有足够的休息时间                                   | 1   | 2    | 3    | 4    | 5  |
| 11 | 必要时，可以向医生、助产士、护士等医务人员咨询母乳喂养的方法                          | 1   | 2    | 3    | 4    | 5  |

您的联系方式 电话：\_\_\_\_\_（仅供后期随访用）

## Breastfeeding social support scale

How do you perceive your breastfeeding situation? Please choose your answer to each item presented below from “Does not apply to me” to “Applies to me.”

|   |                                                                                                                                                                                   | あてはまらない | ややあてはまらない | どちらともいえない | ややあてはまる | あてはまる |
|---|-----------------------------------------------------------------------------------------------------------------------------------------------------------------------------------|---------|-----------|-----------|---------|-------|
| 1 | 母乳育児について気楽に話せる相手がいる。<br>There is someone with whom I can easily and openly discuss breastfeeding.                                                                                 | 1       | 2         | 3         | 4       | 5     |
| 2 | 赤ちゃんにおっぱいをあげる時間を取りやすいように、家事や育児を負担してくれる人がある。<br>There is someone who helps with other child care and with housework such that it's easy for me to make time to breastfeed my baby. | 1       | 2         | 3         | 4       | 5     |
| 3 | 身近な人が、母乳育児をしているあなたの心の支えになってくれる。<br>There is someone close to you who gives you emotional support in breastfeeding.                                                                | 1       | 2         | 3         | 4       | 5     |
| 4 | 母乳育児の良かった経験を話してくれる人がある。<br>There is someone who tells me about positive experiences of breastfeeding.                                                                             | 1       | 2         | 3         | 4       | 5     |
| 5 | あなたが赤ちゃんのお世話をしやすいように、家事や育児を負担してくれる人がある。<br>There is someone who helps you with other child care and with housework such that it's easy for you to take care of your baby.         | 1       | 2         | 3         | 4       | 5     |
| 6 | 必要になったら、母乳育児について家族や友人以外の人（たとえば、医療関係者や母乳育児支援グループの人）に相談できる。<br>If necessary, there is someone other than family or friends whom I can consult on breastfeeding.                     | 1       | 2         | 3         | 4       | 5     |

|    |                                                                                                                                                                                       |   |   |   |   |   |
|----|---------------------------------------------------------------------------------------------------------------------------------------------------------------------------------------|---|---|---|---|---|
| 7  | <p>医師、助産師、保健師などの医療関係者の多くは、あなたの母乳育児を応援している。</p> <p>Most health care providers (doctors, public health nurses, midwives, etc.) support you in breastfeeding.</p>                        | 1 | 2 | 3 | 4 | 5 |
| 8  | <p>医師、助産師、保健師などの医療関係者が、母乳育児の利点を教えてくれる。</p> <p>Health care providers including doctors, public health nurses, or midwives tell me about the benefits of breastfeeding.</p>             | 1 | 2 | 3 | 4 | 5 |
| 9  | <p>母乳育児について困ったことがある時に相談できる人がいる。</p> <p>There is someone I can talk with whenever I have issues with breastfeeding.</p>                                                                | 1 | 2 | 3 | 4 | 5 |
| 10 | <p>あなたが休養をとれるように身近な人達が配慮してくれる。</p> <p>There are people around you who help you get enough rest.</p>                                                                                   | 1 | 2 | 3 | 4 | 5 |
| 11 | <p>必要なときには、医師、助産師、保健師などの医療関係者に母乳育児のやり方を相談できる。</p> <p>If necessary, I can consult with health care providers (doctors, public health nurses, midwives, etc.) on how to breastfeed.</p> | 1 | 2 | 3 | 4 | 5 |

The English translation provided here is to be used not for collecting data, but rather for informational purposes only. It has not been tested in English for use among English-speaking mothers.
