# Supplementary material for: The status quo and influencing factors of breastfeeding social support in China based on LASSO regression model
Source: PeerJ journal article supplement (doi:10.7717/peerj.18779), 2025-01-03
Supplement: General_information_questionnaire2.pdf [file General_information_questionnaire2.pdf]

### 一般资料调查表

请您根据实际情况填写相应的内容，或在最合适您情况的选项上打“√”

1. 您的年龄\_\_\_\_\_岁

2. 您的民族：☐①汉族 ☐②少数民族：\_\_\_\_\_族（请注明）

3. 您的文化程度：

☐①初中及以下 ☐②高中、中专或技校 ☐③大专 ☐④本科 ☐⑤硕士及以上

4. 您的职业：☐①专业技术人员 ☐②国家机关、党群组织、企事业单位负责人 ☐③办事人员和有关人员 ☐④社会生产服务和生活服务人员 ☐⑤农、林、牧、渔业生产及辅助人员 ☐⑥生产、运输设备操作人员及有关人员 ☐⑦军人 ☐⑧在家待业 ☐⑨学生 ☐⑩其它

5. 您的家庭人均月收入（元/月）：☐①<3000 ☐②3000~4999 ☐③5000~7999 ☐④≥8000

6. 您最近一次的分娩方式：

☐①自然分娩（顺产） ☐②剖腹产 ☐③阴道助产（产钳助产或胎头吸引）

7. 您目前有几个宝宝：☐①1个 ☐②2个 ☐③≥3个

8. 您最小宝宝的性别：☐①男 ☐②女

9. 您最小宝宝的月龄\_\_\_\_\_月（请注明）

10. 目前最小宝宝的喂养方式：

☐①纯母乳喂养（只喂母乳，不加喂任何东西）

☐②几乎纯母乳喂养（除喂母乳外，加喂水或维生素）

☐③高比例母乳喂养（喂母乳的量占宝宝全部食物的比例≥80%）

☐④中比例母乳喂养（上述之比为20~79%）

☐⑤低比例母乳喂养（上述之比为<20%）

11. 您采用的坐月子方式：☐①由家人照顾 ☐②雇佣月嫂照顾 ☐③去月子中心 ☐④请保姆照顾

12. 您夜间是否哺乳最小宝宝？☐①是 ☐②否

13. 您最小宝宝白天的主要看护人（可多选）：

☐①爷爷奶奶/姥姥姥爷 ☐②自己 ☐③父亲 ☐④保姆/月嫂/其他

14. 如果您有固定工作，您的产假时间\_\_\_\_\_天（请注明）（如无产假，可以写0）

15. 如果您有固定工作，您是否重返工作岗位？☐①是 ☐②否（若否，请跳转至21题）

16. 您的单位是否有哺乳室？☐①是 ☐②否

17. 您参加孕妇学校或产前教育知识讲座的情况（线上或线下）？

☐①从来没有 ☐②1~3 次 ☐③4~6 次 ☐④7 次以上

18. 您的伴侣参加孕妇学校或产前教育知识讲座的情况（线上或线下）？

☐①从来没有 ☐②1~3 次 ☐③4~6 次 ☐④7 次以上

19. 您所在的社区宣传母乳喂养的方式是：

☐①宣传栏、宣传手册、宣传教育活动 ☐②电话、短信、网络宣传或咨询 ☐③上门提供哺乳指导 ☐④无

### General information questionnaire

Please fill in the corresponding content based on the actual situation, or tap "√" on the option that best suits your situation

1. Your age \_\_\_\_\_
2. Ethnic group: ☐①the Han nationality ☐②the other nationality: \_\_\_\_\_ (Please indicate)
3. Your highest level of schooling:  
☐①junior high ☐②high school ☐③college ☐④university ☐⑤postgraduate or higher
4. Your employment status: ☐①be unemployed ☐②be employed
5. Your per capita monthly income (\$/month): ☐①<3000 ☐②3000~4999 ☐③5000~7999  
☐④≥8000
6. Your most recent method of childbirth:  
☐①Natural birth ☐②caesarean birth ☐③Assisted vaginal delivery (Forceps-assisted delivery or fetal head suction)
7. How many babies do you have currently: ☐①one ☐②two ☐③three
8. The gender of your youngest baby: ☐①male ☐②female
9. The age of your youngest baby\_\_\_\_\_ (Please indicate)
10. The current feeding pattern of the youngest baby:  
☐①Exclusive breastfeeding (only breast milk, nothing more)  
☐②Almost exclusive breastfeeding (in addition to breast milk, with water or vitamins)  
☐③High proportion of breastfeeding (≥80% of your baby's total food is fed breast milk)  
☐④Moderate proportion of breastfeeding (20~79% of the above ratio)  
☐⑤Low proportion of breastfeeding (<20%)
11. Your method of confinement: ☐①family members ☐②confinement nurse ☐③confinement center ☐④nanny
12. Do you breastfeed your youngest baby at night? ☐①yes ☐②no
13. Your youngest baby's main caregiver during the day:  
☐①grandmother/grandfather ☐②own ☐③father ☐④nanny/confinement nurse
14. If you have a regular job, your maternity leave time \_\_\_\_\_ (please indicate) (if you do not have maternity, you can write 0).
15. If you have a regular job, do you return to work? ☐①yes☐②no (If no, please jump to

question 21)

16. Does your workplace have a lactation room? ☐①yes ☐②no

17. Have you attended a maternity school or prenatal education seminar (online or offline)?

☐①never ☐②1~3times ☐③4~6times ☐④More than 7 times

18. Have your partner attended a maternity school or prenatal education seminar (online or offline)?

☐①never ☐②1~3times ☐③4~6times ☐④More than 7 times

19. The way of your community to promote breastfeeding:

☐①Bulletin board ☐②phoned or texted or answered questions ☐③provided house calls  
☐④no
