# Supplementary material for: The status quo and influencing factors of breastfeeding social support in China based on LASSO regression model
Source: PeerJ journal article supplement (doi:10.7717/peerj.18779), 2025-01-03
Supplement: Tian_Sun-Categorical_Data_.xlsx [file Tian_Sun-Categorical_Data_.xlsx]

## Sheet: Sheet1
ID	Total Scores	Age	Ethnic groups	Highest level of schooling	Employment status	Financial status	The most recent delivery mode	Number of babies	Gender of the youngest baby	The age of the youngest baby	The feeding mode of the youngest baby	The way of confinement	Whether or not breastfeeding at night	Main caregiver of the youngest baby during the day	Maternity leave time	Return to work	Lactation room in the workplace	Mother attended school/lecture for pregnant women	Partner attended school/lecture for pregnant women	Community promotion of breastfeeding methods
1	55	3	1	3	1	3	2	2	2	1	1	1	1	2	2	1	1	2	2	4
2	48	2	1	4	1	4	2	1	1	1	4	1	1	2	3	1	1	2	2	1
3	52	3	1	1	1	4	1	2	2	2	4	1	1	2	1	1	2	2	1	4
4	55	2	2	5	1	4	2	1	2	1	1	1	1	2	3	2	3	1	1	4
5	45	2	2	2	1	3	2	3	1	2	1	1	1	2	2	1	2	1	1	4
6	47	2	1	2	2	1	2	1	1	1	4	3	1	1	5	3	3	1	1	1
7	55	2	2	5	1	4	2	2	1	2	4	2	1	4	4	1	2	1	1	4
8	53	1	1	1	2	2	1	2	2	2	3	2	1	4	5	3	3	1	1	2
9	38	2	1	4	1	2	2	2	2	1	3	1	1	2	1	1	2	1	1	1
10	35	2	1	2	1	2	2	2	2	1	1	2	1	1	5	3	3	1	1	1
11	55	3	1	4	1	2	2	3	2	1	1	1	1	2	1	2	3	1	1	1
12	50	1	2	4	1	2	2	1	1	1	2	1	1	2	3	1	1	1	1	4
13	42	1	2	5	1	4	1	1	2	1	1	1	1	1	3	1	2	1	1	1
14	53	2	1	4	1	4	1	2	2	2	4	1	1	1	3	1	1	2	1	4
15	47	2	1	3	1	3	2	2	2	2	3	1	1	2	1	2	3	1	1	4
16	55	1	1	4	1	2	1	1	1	1	1	2	1	2	2	2	3	1	2	3
17	55	2	2	2	1	2	2	1	2	2	5	1	1	1	1	1	2	1	1	1
18	49	1	1	4	1	4	1	1	2	2	5	1	1	2	4	1	2	1	1	4
20	53	2	1	3	2	3	2	2	2	2	4	3	1	1	5	3	3	2	1	4
21	55	3	1	4	1	1	2	3	2	1	2	1	1	2	3	1	2	1	1	1
22	55	2	1	4	1	3	1	1	1	2	4	1	1	1	3	1	1	2	1	4
23	55	2	2	2	2	3	2	3	1	1	4	1	1	1	5	3	3	1	1	1
24	38	2	2	4	1	3	2	1	1	3	3	1	1	1	4	2	3	3	1	1
25	55	2	1	5	1	2	2	1	1	3	3	2	1	2	3	1	2	1	1	1
26	55	2	2	4	1	2	1	1	1	3	3	1	1	2	3	1	2	1	1	1
27	39	2	1	4	1	4	2	1	2	3	3	2	1	4	3	1	2	2	1	4
28	51	2	1	1	2	1	2	2	2	2	2	2	1	4	5	3	3	1	1	4
29	52	2	1	4	1	3	2	2	2	1	5	2	1	2	3	1	2	2	2	4
30	52	2	1	4	1	2	2	2	1	1	3	1	1	1	3	1	1	2	2	4
31	49	2	2	5	1	3	2	1	1	1	4	1	1	1	3	1	1	1	1	2
32	47	2	1	4	1	3	1	1	2	1	1	3	1	2	4	1	2	1	1	4
33	55	2	2	4	1	2	2	1	1	1	3	1	1	2	3	2	3	1	1	4
34	51	2	2	4	1	3	1	1	2	3	4	3	1	4	3	1	2	3	1	4
35	55	1	1	3	1	2	2	1	2	2	3	1	1	2	3	1	2	2	2	4
36	55	2	2	3	1	3	2	1	1	1	1	1	1	1	3	1	1	3	3	4
37	48	3	1	4	1	3	2	1	2	1	1	2	1	2	3	2	3	1	1	4
38	55	1	1	4	1	3	1	1	1	1	1	2	1	4	3	1	2	1	1	1
39	43	3	1	1	2	3	2	1	1	1	4	1	1	1	5	3	3	1	1	1
40	51	3	2	4	1	3	2	2	2	3	1	1	1	2	3	1	2	1	1	4
41	48	2	2	3	1	3	2	1	2	1	3	3	1	4	3	2	3	1	1	4
42	55	1	1	4	1	2	1	1	2	1	1	1	1	1	2	2	3	1	1	4
43	45	2	2	1	2	4	1	2	2	2	1	1	1	2	2	1	1	2	1	2
44	55	1	2	4	1	2	1	1	2	2	3	1	1	2	3	2	3	2	1	4
45	55	2	2	4	2	2	2	2	2	1	1	1	1	2	5	3	3	2	1	1
46	55	2	2	4	1	2	2	3	2	1	1	2	1	2	4	1	2	1	1	1
47	23	3	2	3	2	1	2	1	2	2	3	1	1	2	5	3	3	2	1	2
48	55	2	1	2	1	3	2	1	2	1	1	2	1	1	3	2	3	1	1	1
49	31	2	1	2	2	3	2	2	1	1	4	1	1	2	5	3	3	2	1	1
50	47	2	1	4	2	4	2	2	2	1	5	1	2	2	5	3	3	1	1	4
51	43	2	1	3	1	4	2	1	2	1	3	1	1	1	1	2	3	1	1	4
52	49	2	1	3	1	2	2	1	1	1	1	2	1	2	1	2	3	1	1	4
53	47	2	1	4	1	2	2	2	1	1	1	1	1	2	1	1	1	1	1	4
54	52	1	1	4	1	2	1	1	1	1	3	1	1	1	3	1	2	1	1	4
55	44	2	2	4	1	3	2	1	1	2	3	2	1	2	3	1	2	1	1	4
56	36	2	1	4	1	2	1	1	1	3	3	3	1	2	3	1	2	2	2	1
57	51	2	2	4	1	3	2	1	2	1	1	1	1	2	3	2	3	1	1	4
58	51	2	1	1	2	4	2	3	1	1	3	1	1	1	5	3	3	4	1	2
59	43	2	2	2	1	3	2	2	1	1	1	1	1	3	1	2	3	1	1	4
60	54	1	2	3	1	3	1	1	2	1	1	4	1	2	2	2	3	1	1	1
61	44	1	1	3	1	3	2	1	2	1	1	3	1	1	1	2	3	1	2	4
62	43	1	1	3	1	4	2	1	1	2	5	1	1	2	4	2	3	1	1	4
63	49	1	1	4	1	2	2	1	2	1	1	1	1	2	3	1	1	2	1	1
64	51	3	1	2	1	3	2	2	2	2	3	3	1	2	1	2	3	1	1	4
65	42	2	1	4	2	1	1	3	2	1	1	1	1	1	5	3	3	3	2	4
66	50	1	1	3	1	3	1	1	2	1	1	1	1	2	1	2	3	1	1	4
67	34	2	1	3	2	3	1	1	1	3	5	1	1	1	5	3	3	1	1	4
68	55	2	2	5	1	4	1	1	2	2	3	1	1	1	4	1	2	1	1	4
69	37	3	1	4	1	3	2	1	1	1	1	3	1	4	2	1	2	1	1	4
70	49	3	1	3	1	3	2	2	1	1	2	1	2	1	2	1	2	1	1	4
71	35	3	1	4	1	4	2	2	2	1	4	2	1	1	3	1	2	1	1	1
72	27	1	1	3	1	3	1	1	2	1	5	1	1	2	3	1	2	1	1	4
73	55	2	1	4	1	3	2	1	2	1	1	1	1	1	3	2	3	1	1	4
74	55	2	2	4	1	3	1	2	1	1	1	1	1	2	2	2	3	1	1	1
75	55	3	1	4	1	3	2	2	1	1	3	3	1	2	4	1	2	1	1	4
76	49	3	1	4	2	3	2	2	1	2	5	1	1	2	5	3	3	2	1	1
77	38	1	1	4	1	1	1	1	2	3	5	1	1	2	3	1	2	1	1	1
78	55	2	2	3	2	2	1	2	2	1	1	1	1	2	5	3	3	1	1	2
79	53	3	2	4	1	3	2	1	2	3	4	1	1	2	2	1	1	1	1	1
80	49	1	1	1	1	4	2	1	2	1	1	1	1	2	1	2	3	1	1	4
81	55	2	2	5	1	4	2	1	1	1	2	1	1	2	3	1	1	2	2	4
82	55	3	1	3	1	3	2	1	1	2	4	2	1	1	3	1	2	1	1	4
83	55	2	1	3	2	3	2	3	1	2	4	3	1	4	5	3	3	1	1	4
84	35	3	2	1	2	3	2	3	1	2	3	1	1	2	5	3	3	1	1	1
85	53	2	2	3	1	2	2	2	1	2	3	1	1	2	1	2	3	1	1	1
87	40	2	2	4	1	3	1	1	1	3	3	1	1	1	3	1	2	1	1	4
88	49	2	1	4	2	3	2	1	2	2	3	2	1	1	2	2	3	2	2	1
89	55	1	1	4	1	3	1	1	2	1	1	1	1	2	3	2	3	3	2	1
90	55	2	2	3	2	2	1	1	2	3	3	1	1	1	5	3	3	1	1	1
91	55	1	2	4	1	3	2	1	1	1	1	1	1	1	3	2	3	1	1	4
92	42	2	1	5	1	3	2	1	2	3	3	2	1	2	2	1	2	2	2	2
93	55	2	1	5	1	3	2	1	2	2	5	3	1	1	3	1	2	1	1	4
94	55	1	1	3	1	2	1	1	2	2	5	1	1	2	2	1	2	1	1	4
95	55	2	2	4	1	1	2	2	1	2	3	1	1	2	3	1	2	3	1	4
96	55	3	2	1	2	3	1	2	1	1	1	1	1	2	5	3	3	1	1	4
97	51	2	2	4	1	3	1	1	1	1	1	2	1	1	4	2	3	1	1	4
98	43	1	2	2	2	3	1	2	2	1	1	1	1	1	5	3	3	1	1	1
99	54	1	1	2	1	3	2	2	2	2	1	2	1	1	1	1	2	1	1	1
100	51	2	2	5	1	2	1	1	2	3	3	1	1	1	3	1	2	2	1	4
101	55	2	2	4	1	3	1	2	2	3	4	1	1	2	4	1	2	2	2	4
102	55	3	2	4	1	4	1	1	2	1	3	1	1	2	3	2	3	1	1	1
103	55	1	1	4	1	4	1	1	2	1	1	2	1	2	3	1	2	1	1	1
104	49	2	1	1	2	2	2	2	1	1	1	2	1	1	5	3	3	1	1	3
105	49	1	1	4	1	3	2	2	1	3	3	3	1	3	2	1	2	1	1	1
106	36	2	1	4	1	3	2	1	1	1	4	1	1	2	2	1	1	1	1	1
107	51	2	2	1	2	2	1	2	1	2	3	1	1	1	5	3	3	1	1	4
108	55	1	1	2	1	1	2	1	1	1	1	1	1	1	1	1	2	1	1	1
109	55	1	2	3	1	4	2	1	2	1	3	1	1	1	2	1	2	1	1	4
110	32	2	2	3	2	3	2	2	1	2	3	1	1	1	5	3	3	1	1	4
111	51	2	1	5	1	3	1	1	2	2	3	1	1	2	3	1	2	1	1	1
112	55	2	1	4	1	4	2	1	1	2	3	2	1	1	1	2	3	1	1	1
113	43	2	1	4	1	4	2	2	1	2	4	1	1	1	1	1	2	2	1	4
114	35	1	1	4	1	2	1	1	1	1	1	1	1	2	3	2	3	1	1	4
115	55	2	2	5	1	4	1	1	2	2	2	1	1	2	4	1	2	1	1	2
116	50	1	1	4	1	2	2	1	1	1	2	1	2	2	4	1	1	1	1	4
117	55	1	1	4	1	2	2	1	1	1	4	1	1	2	1	2	3	1	1	3
118	52	1	1	3	1	2	1	1	1	1	1	3	1	4	2	1	2	1	1	2
119	54	1	1	3	1	2	2	1	1	1	3	1	1	4	3	2	3	1	1	1
120	54	1	1	4	1	4	1	1	2	2	4	1	1	2	2	1	2	2	1	1
121	48	2	2	3	1	2	2	1	2	1	3	1	2	1	2	1	2	1	1	4
122	55	1	2	4	1	2	2	1	2	1	1	2	1	2	3	1	2	1	1	2
123	51	3	1	2	2	2	2	3	2	1	4	2	1	1	5	3	3	1	1	1
124	55	1	1	2	2	3	2	2	2	1	1	1	1	2	5	3	3	1	1	1
125	51	1	1	2	2	3	2	1	1	3	4	3	1	1	5	3	3	1	1	4
126	53	1	1	4	2	2	2	1	2	1	1	1	1	1	5	3	3	1	1	1
127	33	1	1	3	1	3	1	1	1	1	5	1	1	2	3	1	2	1	1	4
128	51	3	2	3	2	2	1	2	2	3	5	2	1	4	5	3	3	1	1	1
129	54	2	1	1	1	3	2	2	2	2	3	1	1	2	1	2	3	2	2	2
130	51	2	1	1	2	3	2	2	1	1	4	2	1	2	5	3	3	1	1	4
131	55	2	2	1	2	4	1	2	1	2	1	1	1	1	5	3	3	1	1	1
132	55	2	2	3	1	2	1	2	2	1	4	1	1	2	2	2	3	1	1	4
133	51	2	1	1	2	4	2	2	2	1	1	1	1	1	5	3	3	1	1	4
134	55	1	1	2	1	1	2	3	1	1	4	1	1	2	1	1	2	2	2	4
135	43	1	2	5	1	4	2	3	2	2	4	2	1	2	3	1	2	2	2	4
136	55	2	1	1	2	2	2	1	2	1	1	1	1	1	5	3	3	1	1	1
137	52	2	1	3	1	4	2	2	1	1	1	2	1	1	2	1	2	1	1	1
138	45	3	1	5	1	4	2	1	1	1	3	2	1	1	3	2	3	1	1	4
139	49	1	1	4	1	3	2	1	2	1	4	2	1	2	1	2	3	1	1	4
140	41	2	1	5	1	3	2	3	2	2	4	1	1	2	3	1	2	2	1	4
141	55	2	2	4	1	2	2	2	2	3	5	1	1	1	3	1	1	1	1	4
142	55	1	1	3	1	2	1	1	1	1	1	1	1	1	1	2	3	1	1	4
143	29	1	1	2	1	2	1	1	2	2	3	1	1	2	1	1	2	1	1	4
144	40	2	1	3	2	2	2	1	1	2	5	2	1	2	5	3	3	1	1	4
145	41	2	2	1	2	2	2	2	1	1	3	1	1	1	5	3	3	1	1	1
146	55	2	1	3	1	3	1	2	2	1	3	1	1	2	4	2	3	1	1	4
147	55	1	1	2	1	2	2	2	1	1	1	2	1	2	1	1	2	2	2	1
148	55	1	2	4	1	3	1	1	2	1	1	1	1	2	3	1	1	1	1	1
149	53	1	1	4	2	3	2	2	2	1	1	1	1	1	5	3	3	2	1	4
150	43	3	2	4	2	3	2	2	2	2	3	2	1	2	5	3	3	1	1	4
151	55	1	1	5	1	2	2	3	2	1	1	3	1	4	3	1	1	1	1	4
152	53	2	2	5	1	2	1	2	2	1	1	1	1	1	3	1	2	1	1	4
153	50	2	1	4	2	3	3	1	1	2	3	2	1	1	5	3	3	1	1	1
154	55	1	2	2	1	3	2	1	2	1	1	1	1	2	1	2	3	1	1	4
155	47	2	2	5	1	3	1	3	2	2	3	1	1	2	3	1	2	1	1	4
156	55	2	1	4	1	1	2	1	2	1	1	2	1	2	3	1	2	1	1	4
157	55	2	1	3	1	3	2	1	2	1	3	2	1	1	3	1	1	1	1	4
158	55	2	1	4	1	3	2	2	2	2	4	2	1	2	3	1	2	1	1	1
159	51	3	1	2	2	4	2	2	2	2	3	1	1	2	5	3	3	1	1	2
160	41	2	2	4	1	4	1	2	1	2	4	3	1	1	1	2	3	1	1	2
161	54	1	1	3	1	2	1	1	1	1	1	1	1	1	3	2	3	1	1	4
162	48	1	1	4	1	2	2	1	1	1	3	2	1	1	4	2	3	1	1	4
163	43	1	2	2	2	3	1	2	2	2	3	2	1	2	5	3	3	1	1	4
164	55	3	1	1	2	3	2	2	1	1	1	1	1	2	5	3	3	1	1	4
165	55	2	1	5	1	4	1	1	1	1	5	2	1	1	3	1	2	1	1	1
166	54	2	1	4	1	2	2	2	2	1	3	1	1	2	3	1	2	2	1	4
167	46	3	1	1	2	1	2	2	2	1	2	1	1	2	5	3	3	1	1	4
168	55	2	1	5	1	3	1	1	1	1	3	3	1	2	3	1	2	2	2	4
169	51	2	1	3	1	2	1	2	2	1	1	3	1	2	2	2	3	1	1	4
170	55	1	1	4	1	1	1	3	2	2	3	2	1	2	1	2	3	1	1	1
171	28	1	1	4	1	2	1	1	1	1	2	1	1	1	3	1	2	1	1	4
172	54	2	2	3	1	3	2	2	2	1	2	1	1	2	3	1	2	3	2	4
173	55	2	2	4	1	1	1	2	1	3	4	1	1	2	1	1	2	1	1	1
174	44	1	2	3	1	2	2	1	2	1	2	1	1	2	1	1	2	1	1	4
175	55	1	2	4	1	4	2	1	1	1	1	3	1	1	2	1	1	4	4	4
176	49	2	1	1	1	3	2	2	2	2	4	2	1	2	1	2	3	1	1	1
177	55	2	1	4	1	3	2	1	1	2	3	3	1	1	3	1	2	1	1	1
178	55	1	2	3	1	3	2	1	2	1	4	2	1	4	2	1	2	1	1	4
179	50	2	2	4	2	1	2	1	1	3	3	1	1	2	5	3	3	2	1	4
180	48	2	1	4	1	3	1	2	2	1	1	1	1	2	3	2	3	2	2	1
181	55	2	2	4	1	3	1	1	1	2	4	1	1	4	2	1	2	1	1	1
182	55	2	2	4	1	2	1	1	1	1	1	1	1	2	3	1	2	1	1	4
183	55	1	1	4	1	4	1	1	2	1	1	2	1	1	1	2	3	3	3	1
184	53	1	1	3	1	2	2	1	2	2	3	1	1	2	4	1	2	1	1	1
185	47	2	1	4	2	4	2	1	1	1	4	2	1	1	5	3	3	1	1	3
186	55	3	1	1	2	2	2	3	1	2	4	1	1	1	5	3	3	3	1	2
187	55	2	1	4	1	4	2	1	2	3	5	1	1	2	4	1	1	1	1	4
188	53	1	1	4	1	3	2	1	1	2	1	2	1	2	1	2	3	2	2	1
189	55	2	2	2	1	3	2	1	1	2	3	3	1	1	4	1	1	3	2	4
190	55	2	1	1	2	3	1	2	1	1	1	1	1	1	5	3	3	1	1	4
191	55	1	2	1	2	2	2	1	2	1	1	3	1	2	5	3	3	1	1	1
192	11	1	1	3	2	2	1	1	1	1	2	1	2	1	5	3	3	1	1	1
193	52	2	1	2	1	3	2	2	1	1	1	1	1	2	2	2	3	1	1	4
194	39	1	2	4	1	2	1	1	2	1	1	1	1	2	3	1	1	1	1	1
195	50	2	2	4	1	2	2	1	2	1	1	2	1	2	3	2	3	1	1	1
196	51	1	1	4	1	4	2	1	2	1	3	1	1	2	3	1	1	2	2	4
197	37	1	1	2	1	3	2	1	2	1	1	2	1	1	1	2	3	1	1	4
198	43	1	2	2	1	3	1	2	1	2	1	1	1	2	4	2	3	1	1	4
199	35	3	1	1	2	1	1	2	2	1	1	1	1	2	5	3	3	1	1	4
200	50	1	1	4	1	2	2	1	2	1	2	1	1	2	3	1	2	1	1	4
201	27	2	2	1	2	1	1	3	2	2	3	2	1	1	5	3	3	1	1	2
202	46	1	1	2	2	2	1	2	1	1	1	2	1	1	5	3	3	1	1	4
203	47	2	1	3	2	2	1	2	2	3	5	1	1	1	5	3	3	1	1	2
204	51	1	1	3	1	2	1	1	2	1	3	1	1	1	3	1	2	1	1	1
205	39	3	2	3	1	3	1	2	1	2	3	1	1	2	1	2	3	1	1	1
206	53	1	2	2	2	2	2	1	2	1	2	1	1	2	5	3	3	1	1	4
207	52	1	1	3	1	3	2	1	1	3	3	2	1	4	1	1	2	1	1	4
208	39	1	1	3	2	3	2	1	1	2	3	1	1	1	5	3	3	1	1	4
209	32	1	1	2	2	2	2	1	2	1	1	2	1	2	5	3	3	1	1	1
210	34	1	1	3	2	2	1	2	1	2	3	2	1	2	5	3	3	1	1	1
211	51	1	1	3	2	3	2	1	2	2	3	2	1	1	5	3	3	1	1	1
212	48	1	1	2	2	3	2	1	2	1	1	3	1	3	5	3	3	1	1	1
213	29	2	1	2	1	3	2	2	2	1	3	1	1	2	1	2	3	1	1	4
214	55	2	1	3	1	3	1	2	1	2	3	2	1	2	3	1	2	1	1	1
215	55	3	1	2	2	1	1	3	1	1	4	1	1	2	5	3	3	1	1	3
216	36	1	1	4	1	4	2	1	1	1	3	1	1	2	1	2	3	1	1	4
217	55	3	1	3	1	2	2	1	2	2	4	1	1	2	3	2	3	1	1	4
218	55	1	2	4	2	3	1	2	1	1	1	1	1	2	5	3	3	1	1	1
219	55	2	1	2	2	3	1	1	1	1	1	1	1	2	5	3	3	1	1	4
220	55	1	2	3	1	2	2	1	2	1	3	2	1	1	2	1	2	1	1	4
221	55	3	2	4	1	3	2	2	1	1	5	1	1	1	3	1	1	1	1	1
222	55	1	2	2	2	2	1	2	1	1	1	3	1	1	5	3	3	2	1	1
223	55	1	1	4	1	4	1	1	2	1	3	1	1	1	3	2	3	2	2	1
224	55	1	1	1	2	3	2	1	1	2	3	1	1	1	5	3	3	1	1	1
225	55	2	1	4	1	3	2	1	1	1	1	2	1	1	3	2	3	2	2	4
226	44	2	1	1	2	3	2	1	2	2	3	2	1	1	5	3	3	1	1	1
227	55	1	2	3	2	3	2	2	2	2	4	1	1	2	5	3	3	1	1	4
228	55	1	1	2	1	2	1	1	2	1	3	1	1	2	2	2	3	1	1	4
229	55	3	1	3	2	4	1	1	2	1	1	1	1	2	5	3	3	1	1	4
230	55	1	2	3	2	4	1	1	1	2	5	2	1	1	5	3	3	1	1	2
231	43	1	1	1	2	1	2	3	2	1	4	1	1	2	5	3	3	1	1	1
232	55	1	2	2	2	3	2	1	1	1	1	2	1	2	5	3	3	1	1	1
233	51	2	1	4	1	3	2	2	1	2	1	2	1	1	1	2	3	1	1	4
234	51	1	1	3	2	4	2	2	1	1	1	1	1	2	5	3	3	1	1	4
235	39	2	2	1	2	3	2	2	1	1	1	3	1	2	5	3	3	1	1	4
236	55	1	1	1	2	2	1	1	1	2	3	2	1	4	5	3	3	1	1	4
237	52	1	1	3	1	3	2	1	1	1	4	1	1	2	3	1	2	1	1	1
238	55	2	1	2	1	3	2	2	2	2	2	1	1	2	1	1	2	1	1	1
239	16	1	2	3	1	4	1	1	2	1	4	2	1	1	1	2	3	1	1	4
240	51	3	1	1	1	1	2	2	1	1	1	4	1	2	1	2	3	1	1	4
241	53	3	1	1	1	3	2	1	1	1	1	1	1	2	1	2	3	1	1	1
242	31	1	2	2	2	3	1	1	2	3	4	1	1	2	5	3	3	1	1	2
243	47	1	1	1	2	2	1	1	1	1	5	2	1	1	5	3	3	1	1	4
